# Supplementary material
Source: PubMed Central journal article supplement (PMC5444881)
Supplement: NIHMS858313-supplement-Supplement1.pdf [file NIHMS858313-supplement-Supplement1.pdf]

## Supplementary Appendix

This appendix has been provided by the authors to give readers additional information about their work.

Supplement to: Shipley WU, Seiferheld W, Lukka HR, et al. Radiation with or without antiandrogen therapy in recurrent prostate cancer. *N Engl J Med* 2017;376:417-28. DOI: [10.1056/NEJMoa1607529](https://doi.org/10.1056/NEJMoa1607529)

## Supplementary Appendix

Supplement to: Shipley WU, Seiferheld W, Lukka HR, et al. NRG Oncology RTOG 9601: A randomized trial of salvage radiotherapy with or without anti-androgen therapy in prostate cancer patients with recurrence following radical prostatectomy

### Contents

|                                                                                                                                                                                                                                                |    |
|------------------------------------------------------------------------------------------------------------------------------------------------------------------------------------------------------------------------------------------------|----|
| Figure S1. Kaplan-Meier estimates of overall survival (Panel A) and Cumulative-incidence estimates of disease-specific biochemical (PSA) recurrence (Panel B). AAT denotes anti-androgen therapy and panel A shows a <i>post hoc</i> analysis. | 2  |
| Figure S2. Effect of anti-androgen therapy (AAT) on the 12 year metastatic PC rate.                                                                                                                                                            | 3  |
| Table S1. Definition of Second Biochemical Recurrence                                                                                                                                                                                          | 4  |
| Table S2. Cause of Death (Centrally Reviewed)                                                                                                                                                                                                  | 5  |
| Table S3. Overall Survival Multivariate Cox Model                                                                                                                                                                                              | 6  |
| Table S4. Study Endpoints                                                                                                                                                                                                                      | 7  |
| Table S5. Non-Disease Specific Survival (Centrally Reviewed)                                                                                                                                                                                   | 8  |
| Table S6. Distribution of Patients by Highest Grade Toxicity Acute Radiotherapy                                                                                                                                                                | 9  |
| Table S7. Distribution of Patients by Highest Grade Toxicity Hormone Therapy and Late Radiotherapy                                                                                                                                             | 10 |
| Table S8. List of Investigators                                                                                                                                                                                                                | 11 |

**Figure S1. Kaplan-Meier estimates of overall survival (Panel A) and Cumulative-incidence estimates of disease-specific biochemical (PSA) recurrence (Panel B). AAT denotes anti-androgen therapy and panel A shows a *post hoc* analysis.**

A: Overall Survival - Positive Margins

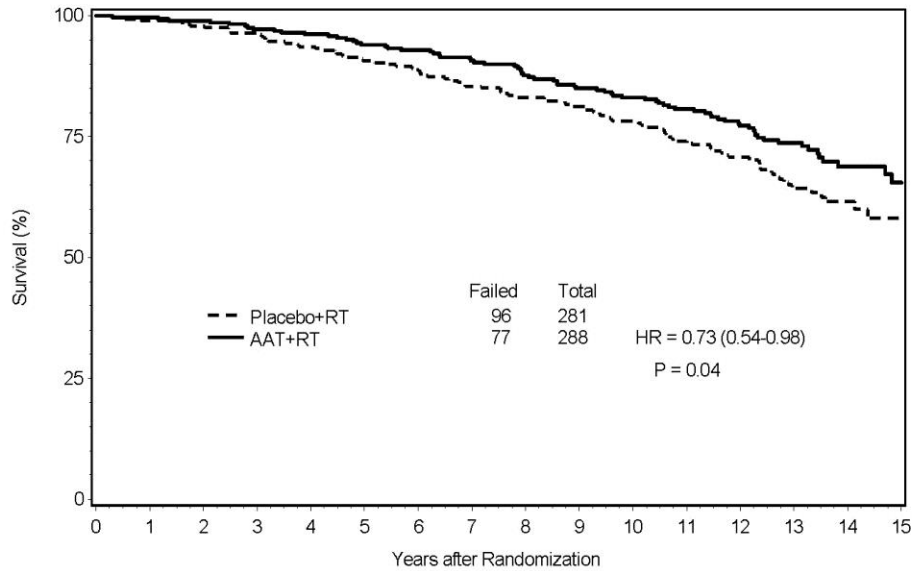

| No. at Risk | 0   | 5   | 10  | 15 |
|-------------|-----|-----|-----|----|
| Placebo+RT  | 281 | 268 | 237 | 16 |
| AAT+RT      | 288 | 277 | 254 | 25 |

B: Time to 2nd PSA Failure

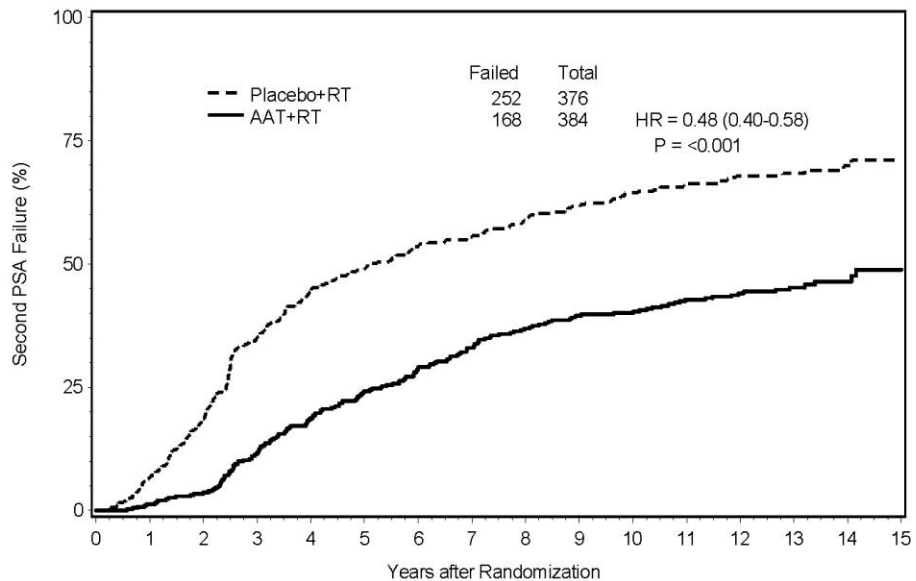

| No. at Risk | 0   | 5   | 10  | 15 |
|-------------|-----|-----|-----|----|
| Placebo+RT  | 376 | 236 | 156 | 5  |
| AAT+RT      | 384 | 324 | 236 | 13 |

**Figure S2. Effect of anti-androgen therapy (AAT) on the 12 year metastatic PC rate.**

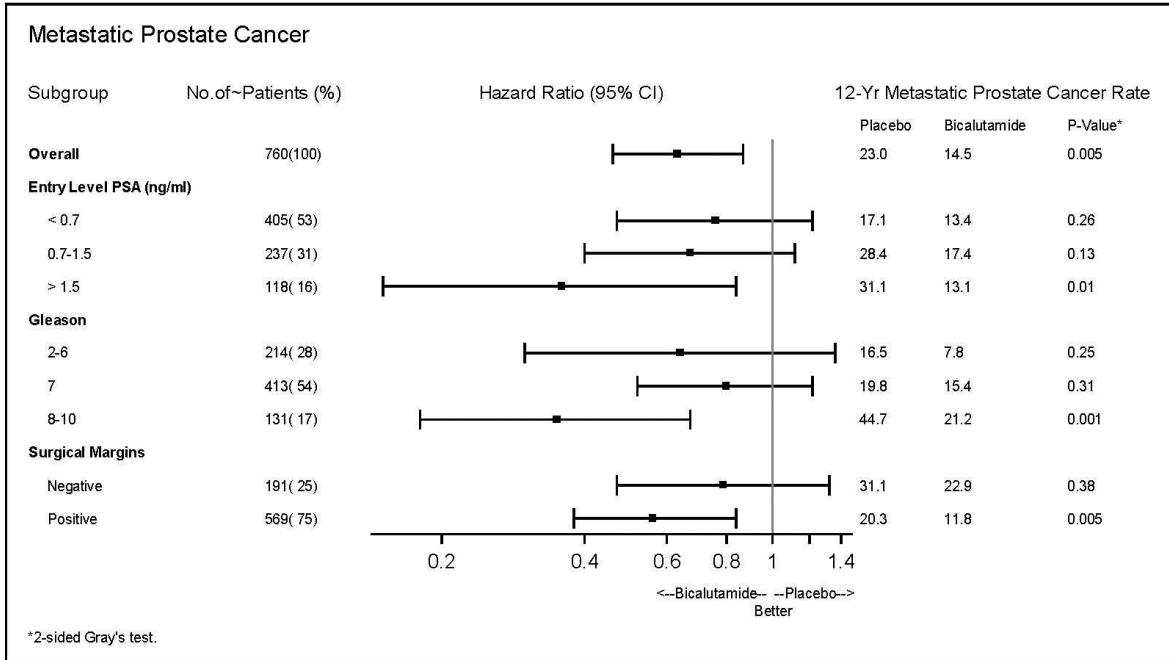

**Table S1. Definition of Second Biochemical Recurrence**

---

Biochemical (PSA) recurrence is defined as the first occurrence of one of the following events:

- Increase in PSA following protocol treatment according to the following criteria met during protocol treatment:
    - If PSA decreased to undetectable level ( $<0.2$  ng/mL) during protocol treatment
      - Recurrence = increase in PSA after protocol treatment to 0.5 ng/mL or more after protocol treatment
    - If PSA decreased to a detectable level ( $\geq 0.2$  ng/mL) during protocol treatment
      - Recurrence= increase in PSA after protocol treatment of 0.3 ng/mL or more above the lowest detectable level
    - If PSA did not decrease during protocol treatment
      - Recurrence= increase in PSA after protocol treatment of 0.5 ng/mL or more above entry PSA level
  - The start of salvage hormone therapy
-

**Table S2. Cause of Death (Centrally Reviewed)**

|                                                                | <b>RT+Placebo<br/>(n=131)</b> | <b>RT+ AAT*<br/>(n=108)</b> |
|----------------------------------------------------------------|-------------------------------|-----------------------------|
| Centrally reviewed cause of death                              |                               |                             |
| Treated cancer                                                 | 46 (35.1%)                    | 21 (19.4%)                  |
| Second Primary                                                 | 21 (16.0%)                    | 30 (27.8%)                  |
| Other cause                                                    | 47 (35.9%)                    | 49 (45.4%)                  |
| Unknown                                                        | 17 (13.0%)                    | 8 (7.4%)                    |
| Other cause of death specification reported by institution     | (n=47)                        | (n=49)                      |
| Blood/lymph disease                                            | 1 (2.1%)                      | 0 (0.0%)                    |
| Cardiovascular (MI, CHF)                                       | 21 (44.7%)                    | 15 (30.6%)                  |
| Cerebrovascular (stroke, CVA)                                  | 1 (2.1%)                      | 5 (10.2%)                   |
| Decompensated cirrhosis                                        | 1 (2.1%)                      | 0 (0.0%)                    |
| Diabetes                                                       | 1 (2.1%)                      | 0 (0.0%)                    |
| Fell off trampoline and hit head on rock                       | 0 (0.0%)                      | 1 (2.0%)                    |
| Hemoptysis                                                     | 0 (0.0%)                      | 1 (2.0%)                    |
| Infectious disease                                             | 3 (6.4%)                      | 7 (14.3%)                   |
| Interstitial lung disease                                      | 1 (2.1%)                      | 0 (0.0%)                    |
| Metastatic cancer                                              | 1 (2.1%)                      | 0 (0.0%)                    |
| Multiple comorbid disease                                      | 0 (0.0%)                      | 1 (2.0%)                    |
| Neurological (dementia, Alzheimer's)                           | 3 (6.4%)                      | 3 (6.1%)                    |
| Pulmonary (respiratory failure/COPD)                           | 0 (0.0%)                      | 1 (2.0%)                    |
| Pulmonary, aspiration                                          | 1 (2.1%)                      | 0 (0.0%)                    |
| Renal failure                                                  | 1 (2.1%)                      | 0 (0.0%)                    |
| Respiratory Failure                                            | 1 (2.1%)                      | 0 (0.0%)                    |
| Site reported cause of death: Complications of other treatment | 0 (0.0%)                      | 1 (2.0%)                    |
| Site reported cause of death: Second Primary                   | 0 (0.0%)                      | 1 (2.0%)                    |
| Site reported cause of death: Unknown                          | 8 (17.0%)                     | 13 (26.5%)                  |
| Trauma (accidental)                                            | 2 (4.3%)                      | 0 (0.0%)                    |

\* AAT: Anti-Androgen Therapy

Salvage radiation and anti-androgen therapy in prostate cancer

**Table S3. Overall Survival Multivariate Cox Model**

| Covariate          | Comparison          | HR (95% CI)       | p-value* |
|--------------------|---------------------|-------------------|----------|
| Treatment Arm      | AAT** vs. Placebo   | 0.75 (0.58, 0.96) | 0.025    |
| Entry PSA Level(1) | 1.6-4.0 vs. 0.2-1.5 | 1.59 (1.17, 2.17) | 0.003    |
| Age                | >=65 vs. <65        | 2.18 (1.66, 2.85) | <.001    |
| KPS                | 100 vs. 80,90       | 0.78 (0.59, 1.04) | 0.096    |
| Gleason Score      | 7 vs. 2-6           | 1.23 (0.90, 1.68) | 0.196    |
|                    | 8-10 vs. 2-6        | 1.89 (1.30, 2.74) | <.001    |

HR = hazard ratio, CI = confidence interval

\*Two-sided log-rank p-value

\*\* AAT: Anti-Androgen Therapy

Initial variables: treatment group, prior hormone therapy, entry PSA level, PSA nadir after surgery, positive surgical margins, age, KPS, Gleason score, race

Final models were determined using a stepwise method with entry and exit significant levels of 0.10 and 0.15, respectively.

(1) Stratification variables

**Table S4. Study Endpoints**

| <b>Event Type</b>             | <b>12-Year Rate (%)</b>       |                              | <b>Hazard Ratio</b> | <b>P-value</b> |
|-------------------------------|-------------------------------|------------------------------|---------------------|----------------|
|                               | <b>RT+Placebo<br/>(n=376)</b> | <b>RT+ AAT**<br/>(n=384)</b> |                     |                |
| Overall survival              | 71.3                          | 76.3                         | 0.77 (0.59-0.99)    | 0.04           |
| Distant recurrence            | 23.0                          | 14.5                         | 0.63 (0.46-0.87)    | 0.005          |
| Local progression             | 4.7                           | 1.8                          | 0.36 (0.15-0.85)    | 0.02           |
| Second biochemical recurrence | 67.9                          | 44.0                         | 0.48 (0.40-0.58)    | <0.001         |
| Third biochemical recurrence  | 80.7                          | 84.2                         | 1.11 (0.85-1.46)    | 0.43           |
| Disease progression           | 69.2                          | 47.1                         | 0.51 (0.42-0.61)    | <0.001         |
| Prostate cancer death         | 13.4                          | 5.4                          | 0.49 (0.32-0.74)    | <0.001         |
| Non-prostate cancer death     | 15.3                          | 17.9                         | 1.10 (0.79-1.53)    | 0.58           |

\*Third biochemical recurrence only includes patients who started salvage hormone therapy, n=128 and 90 for the two groups respectively.

\*\* AAT: Anti-Androgen Therapy



**Table S5. Non-Disease Specific Survival (Centrally Reviewed)**

| Year  | RT+Placebo   |            |                     |         | RT+AAT*      |            |                     |         |
|-------|--------------|------------|---------------------|---------|--------------|------------|---------------------|---------|
|       | Estimate (%) | 95% CI (%) | Cumulative Failures | At Risk | Estimate (%) | 95% CI (%) | Cumulative Failures | At Risk |
| 0     | 0.0          | --         | 0                   | 376     | 0.0          | --         | 0                   | 384     |
| 1     | 0.8          | 0.2-2.2    | 4                   | 372     | 0.5          | 0.1-1.8    | 2                   | 382     |
| 2     | 1.9          | 0.8-3.6    | 7                   | 368     | 1.0          | 0.4-2.5    | 4                   | 376     |
| 3     | 3.2          | 1.7-5.4    | 12                  | 359     | 2.9          | 1.5-4.9    | 11                  | 368     |
| 4     | 4.5          | 2.8-7.0    | 17                  | 350     | 3.9          | 2.3-6.3    | 15                  | 362     |
| 5     | 5.6          | 3.6-8.3    | 21                  | 332     | 5.6          | 3.6-8.2    | 21                  | 347     |
| 6     | 6.8          | 4.5-9.6    | 25                  | 319     | 6.4          | 4.2-9.2    | 24                  | 337     |
| 7     | 7.9          | 5.4-10.9   | 29                  | 307     | 8.1          | 5.6-11.1   | 30                  | 326     |
| 8     | 9.0          | 6.3-12.2   | 33                  | 294     | 10.0         | 7.2-13.4   | 37                  | 308     |
| 9     | 9.9          | 7.1-13.2   | 36                  | 280     | 12.0         | 8.9-15.6   | 44                  | 294     |
| 10    | 11.9         | 8.8-15.5   | 43                  | 262     | 13.5         | 10.2-17.2  | 49                  | 280     |
| 11    | 13.1         | 9.9-16.9   | 47                  | 240     | 15.0         | 11.5-18.9  | 54                  | 259     |
| 12    | 15.3         | 11.8-19.3  | 54                  | 203     | 17.9         | 14.0-22.1  | 63                  | 223     |
| 13    | 17.7         | 13.8-22.0  | 60                  | 130     | 19.7         | 15.7-24.1  | 68                  | 151     |
| 14    | 20.3         | 15.8-25.1  | 64                  | 71      | 20.8         | 16.6-25.4  | 70                  | 78      |
| 15    | 21.5         | 16.5-26.9  | 65                  | 25      | 23.9         | 18.1-30.2  | 72                  | 32      |
| Total |              |            | 67                  |         |              |            | 74                  |         |

\* AAT: Anti-Androgen Therapy

CI = confidence interval.

Univariate analysis

|                                        |                  |
|----------------------------------------|------------------|
| hazard ratio (95% CI) [AAT* /Placebo]: | 1.10 (0.79-1.53) |
| p-value (1-sided log-rank test):       | 0.289            |
| p-value (2-sided log-rank test):       | 0.578            |

Cumulative incidence is used to estimate failure rates.

A failure is defined as any death that does not fall into the following categories: death due to prostate cancer or complications of protocol treatment (centrally reviewed), death with known progressive metastatic disease while on salvage hormone therapy, or death with a known rising PSA while on salvage hormone therapy. All other deaths are considered competing risks.

**Table S6. Distribution of Patients by Highest Grade Toxicity Acute Radiotherapy**

|                       | <b>RT+placebo (n=374)</b>             |               |             |            |            | <b>RT+AAT* (n=382)</b>                |               |            |            |            |
|-----------------------|---------------------------------------|---------------|-------------|------------|------------|---------------------------------------|---------------|------------|------------|------------|
|                       | <b>n and (%) of Patients by Grade</b> |               |             |            |            | <b>n and (%) of Patients by Grade</b> |               |            |            |            |
|                       | <b>1</b>                              | <b>2</b>      | <b>3</b>    | <b>4</b>   | <b>5</b>   | <b>1</b>                              | <b>2</b>      | <b>3</b>   | <b>4</b>   | <b>5</b>   |
| Overall Highest Grade | 160<br>(41.9)                         | 120<br>(31.4) | 16<br>(4.2) | 1<br>(0.3) | 0<br>(0.0) | 191<br>(51.1)                         | 112<br>(29.9) | 8<br>(2.1) | 0<br>(0.0) | 0<br>(0.0) |
| Bladder               | 120<br>(31.4)                         | 45<br>(11.8)  | 11<br>(2.9) | 0<br>(0.0) | 0<br>(0.0) | 143<br>(38.2)                         | 45<br>(12.0)  | 4<br>(1.1) | 0<br>(0.0) | 0<br>(0.0) |
| Bowel                 | 156<br>(40.8)                         | 79<br>(20.7)  | 3<br>(0.8)  | 0<br>(0.0) | 0<br>(0.0) | 158<br>(42.2)                         | 74<br>(19.8)  | 1<br>(0.3) | 0<br>(0.0) | 0<br>(0.0) |
| Hematologic           | 21<br>(5.5)                           | 7<br>(1.8)    | 2<br>(0.5)  | 0<br>(0.0) | 0<br>(0.0) | 27<br>(7.2)                           | 7<br>(1.9)    | 3<br>(0.8) | 0<br>(0.0) | 0<br>(0.0) |
| Skin                  | 79<br>(20.7)                          | 9<br>(2.4)    | 0<br>(0.0)  | 0<br>(0.0) | 0<br>(0.0) | 73<br>(19.5)                          | 14<br>(3.7)   | 0<br>(0.0) | 0<br>(0.0) | 0<br>(0.0) |
| Other                 | 37<br>(9.7)                           | 13<br>(3.4)   | 0<br>(0.0)  | 1<br>(0.3) | 0<br>(0.0) | 57<br>(15.2)                          | 11<br>(2.9)   | 0<br>(0.0) | 0<br>(0.0) | 0<br>(0.0) |

\* AAT: Anti-Androgen Therapy

**Table S7. Distribution of Patients by Highest Grade Toxicity Hormone Therapy and Late Radiotherapy**

|                       | RT+Placebo (n=374)             |               |              |             |            | RT+AAT* (n=382)                |               |              |            |            |
|-----------------------|--------------------------------|---------------|--------------|-------------|------------|--------------------------------|---------------|--------------|------------|------------|
|                       | n and (%) of Patients by Grade |               |              |             |            | n and (%) of Patients by Grade |               |              |            |            |
|                       | 1                              | 2             | 3            | 4           | 5          | 1                              | 2             | 3            | 4          | 5          |
| Overall Highest Grade | 108<br>(28.3)                  | 131<br>(34.3) | 58<br>(15.2) | 14<br>(3.7) | 1<br>(0.3) | 94<br>(25.1)                   | 170<br>(45.5) | 88<br>(23.5) | 9<br>(2.4) | 3<br>(0.8) |
| Bladder/GU            | 106<br>(27.7)                  | 93<br>(24.3)  | 23<br>(6.0)  | 3<br>(0.8)  | 0<br>(0.0) | 109<br>(29.1)                  | 96<br>(25.7)  | 26<br>(7.0)  | 1<br>(0.3) | 0<br>(0.0) |
| Bowel/GI              | 111<br>(29.1)                  | 52<br>(13.6)  | 5<br>(1.3)   | 1<br>(0.3)  | 0<br>(0.0) | 118<br>(31.6)                  | 67<br>(17.9)  | 9<br>(2.4)   | 1<br>(0.3) | 0<br>(0.0) |
| Cardiac               | 4<br>(1.0)                     | 5<br>(1.3)    | 1<br>(0.3)   | 5<br>(1.3)  | 0<br>(0.0) | 9<br>(2.4)                     | 6<br>(1.6)    | 10<br>(2.7)  | 5<br>(1.3) | 2<br>(0.5) |
| Dyspnea               | 6<br>(1.6)                     | 6<br>(1.6)    | 1<br>(0.3)   | 0<br>(0.0)  | 0<br>(0.0) | 3<br>(0.8)                     | 8<br>(2.1)    | 2<br>(0.5)   | 1<br>(0.3) | 0<br>(0.0) |
| Fluid Retention       | 6<br>(1.6)                     | 2<br>(0.5)    | 0<br>(0.0)   | 0<br>(0.0)  | 0<br>(0.0) | 8<br>(2.1)                     | 1<br>(0.3)    | 0<br>(0.0)   | 0<br>(0.0) | 0<br>(0.0) |
| Gynecomastia          | 33<br>(8.6)                    | 8<br>(2.1)    | 0<br>(0.0)   | 0<br>(0.0)  | 0<br>(0.0) | 162<br>(43.3)                  | 90<br>(24.1)  | 14<br>(3.7)  | 0<br>(0.0) | 0<br>(0.0) |
| Headache              | 10<br>(2.6)                    | 3<br>(0.8)    | 0<br>(0.0)   | 0<br>(0.0)  | 0<br>(0.0) | 13<br>(3.5)                    | 0<br>(0.0)    | 0<br>(0.0)   | 0<br>(0.0) | 0<br>(0.0) |
| Hematologic           | 23<br>(6.0)                    | 9<br>(2.4)    | 2<br>(0.5)   | 2<br>(0.5)  | 0<br>(0.0) | 44<br>(11.8)                   | 9<br>(2.4)    | 6<br>(1.6)   | 0<br>(0.0) | 0<br>(0.0) |
| Hot flashes           | 54<br>(14.1)                   | 11<br>(2.9)   | 0<br>(0.0)   | 0<br>(0.0)  | 0<br>(0.0) | 62<br>(16.6)                   | 17<br>(4.5)   | 3<br>(0.8)   | 0<br>(0.0) | 0<br>(0.0) |
| Impotence             | 9<br>(2.4)                     | 20<br>(5.2)   | 16<br>(4.2)  | 0<br>(0.0)  | 0<br>(0.0) | 10<br>(2.7)                    | 24<br>(6.4)   | 28<br>(7.5)  | 0<br>(0.0) | 0<br>(0.0) |
| Liver                 | 12<br>(3.1)                    | 3<br>(0.8)    | 1<br>(0.3)   | 0<br>(0.0)  | 0<br>(0.0) | 8<br>(2.1)                     | 6<br>(1.6)    | 3<br>(0.8)   | 0<br>(0.0) | 0<br>(0.0) |
| Nausea/vomiting       | 9<br>(2.4)                     | 3<br>(0.8)    | 1<br>(0.3)   | 0<br>(0.0)  | 0<br>(0.0) | 16<br>(4.3)                    | 2<br>(0.5)    | 1<br>(0.3)   | 0<br>(0.0) | 0<br>(0.0) |
| Neurologic            | 15<br>(3.9)                    | 9<br>(2.4)    | 3<br>(0.8)   | 1<br>(0.3)  | 0<br>(0.0) | 7<br>(1.9)                     | 11<br>(2.9)   | 6<br>(1.6)   | 2<br>(0.5) | 0<br>(0.0) |
| Pain                  | 28<br>(7.3)                    | 31<br>(8.1)   | 6<br>(1.6)   | 0<br>(0.0)  | 0<br>(0.0) | 24<br>(6.4)                    | 27<br>(7.2)   | 2<br>(0.5)   | 0<br>(0.0) | 0<br>(0.0) |
| Pending               | 4<br>(1.0)                     | 1<br>(0.3)    | 0<br>(0.0)   | 0<br>(0.0)  | 0<br>(0.0) | 7<br>(1.9)                     | 2<br>(0.5)    | 0<br>(0.0)   | 0<br>(0.0) | 0<br>(0.0) |
| Skin-general          | 6<br>(1.6)                     | 9<br>(2.4)    | 2<br>(0.5)   | 0<br>(0.0)  | 0<br>(0.0) | 35<br>(9.4)                    | 13<br>(3.5)   | 1<br>(0.3)   | 0<br>(0.0) | 0<br>(0.0) |
| Skin-within XRT field | 28<br>(7.3)                    | 6<br>(1.6)    | 0<br>(0.0)   | 0<br>(0.0)  | 0<br>(0.0) | 32<br>(8.6)                    | 13<br>(3.5)   | 0<br>(0.0)   | 0<br>(0.0) | 0<br>(0.0) |
| Other                 | 52<br>(13.6)                   | 36<br>(9.4)   | 9<br>(2.4)   | 3<br>(0.8)  | 1<br>(0.3) | 77<br>(20.6)                   | 42<br>(11.2)  | 12<br>(3.2)  | 0<br>(0.0) | 1<br>(0.3) |
| Unknown               | 2<br>(0.5)                     | 0<br>(0.0)    | 0<br>(0.0)   | 0<br>(0.0)  | 0<br>(0.0) | 1<br>(0.3)                     | 0<br>(0.0)    | 0<br>(0.0)   | 0<br>(0.0) | 0<br>(0.0) |

\* AAT: Anti-Androgen Therapy

**Table S8. List of Investigators**

William U. Shipley, M.D.

Wendy Seiferheld, M.S.

Himanshu R. Lukka, M.D.

Pierre P. Major, M.D.

Niall M. Heney, M.D.

David J. Grignon, M.D.

Oliver Sartor, M.D.

Maltibehn P. Patel, M.D.

Jean-Paul Bahary, M.D.

Anthony L. Zietman, M.D.

Thomas M. Pisansky, M.D.

Kenneth L. Zeitzer, M.D.

Colleen A.F. Lawton, M.D.

Felix Y. Feng, M.D.

Richard D. Lovett, M.D.

Alexander G. Balogh, M.D.

Luis Souhami, M.D.

Seth A. Rosenthal, M.D.

Kevin J. Kerlin, M.D.

James J. Dignam, Ph.D.

Stephanie L. Pugh, Ph.D.

Howard M. Sandler, M.D.
